## RETRACTION

# Retraction: Application of deep learning in automatic detection of technical and tactical indicators of table tennis

The *PLOS ONE* Editors

The *PLOS ONE* Editors retract this article [1] because it was identified as one of a series of submissions for which we have concerns about peer review integrity and similarities across articles. These concerns call into question the validity and provenance of the reported results. We regret that the issues were not identified prior to the article's publication.

The author either did not respond directly or could not be reached.

## Reference

1. Qiao F (2021) Application of deep learning in automatic detection of technical and tactical indicators of table tennis. *PLoS ONE* 16(3): e0245259. <https://doi.org/10.1371/journal.pone.0245259> PMID: 33690619

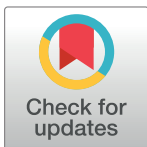

## OPEN ACCESS

**Citation:** The *PLOS ONE* Editors (2023) Retraction: Application of deep learning in automatic detection of technical and tactical indicators of table tennis. *PLoS ONE* 18(9): e0291985. <https://doi.org/10.1371/journal.pone.0291985>

**Published:** September 19, 2023

**Copyright:** © 2023 The PLOS ONE Editors. This is an open access article distributed under the terms of the [Creative Commons Attribution License](https://creativecommons.org/licenses/by/4.0/), which permits unrestricted use, distribution, and reproduction in any medium, provided the original author and source are credited.
